# Supplementary material for: Precrop-treated soil influences wheat (Triticum aestivum L.) root system architecture and its response to drought
Source: PubMed Central journal article supplement (PMC11184070; doi:10.3389/fpls.2024.1389593), 2024-06-04
Supplement: DataSheet_1.pdf [file DataSheet_1.pdf]

Supplementary Table 1) P-value data of the repeated root measurements from a mixed-effect model with variables Cultivar, Top Soil, and Water treatment (plus their interaction) for each day, plus the combined analysis with all variables combined with the time element (day). The P-values highlighted (green) are those that are classified as significant (P>0.05).

| Day | Effect               | Axial Root Length | Lateral Root Length | Total Root Length | Root System Depth | Root System Width | Convex Hull Area |
|-----|----------------------|-------------------|---------------------|-------------------|-------------------|-------------------|------------------|
| 3   | Genotype             | 0.7847            | -                   | 0.7847            | 0.9405            | 0.0237            | 0.1343           |
|     | TopSoil              | 0.5953            | -                   | 0.5953            | 0.1384            | 0.1308            | 0.1368           |
|     | Water                | 0.0065            | -                   | 0.0065            | 0.0006            | 0.4498            | 0.0103           |
|     | Genotype*TopSoil     | 0.137             | -                   | 0.137             | 0.0812            | 0.1371            | 0.0568           |
|     | Genotype*Water       | 0.0454            | -                   | 0.0454            | 0.0523            | 0.3436            | 0.101            |
|     | TopSoil*Water        | 0.0644            | -                   | 0.0644            | 0.1987            | 0.0512            | 0.0304           |
|     | Genoty*TopSoil*Water | 0.4364            | -                   | 0.4364            | 0.9835            | 0.1185            | 0.3039           |
| 5   | Genotype             | 0.2744            | -                   | 0.2744            | 0.7389            | 0.9888            | 0.6103           |
|     | TopSoil              | 0.0946            | -                   | 0.0946            | 0.0373            | 0.018             | 0.018            |
|     | Water                | <.0001            | -                   | <.0001            | <.0001            | 0.0666            | <.0001           |
|     | Genotype*TopSoil     | 0.1425            | -                   | 0.1425            | 0.1798            | 0.5151            | 0.0546           |
|     | Genotype*Water       | 0.184             | -                   | 0.184             | 0.0937            | 0.283             | 0.7256           |
|     | TopSoil*Water        | 0.05              | -                   | 0.05              | 0.1661            | 0.1703            | 0.9014           |
|     | Genoty*TopSoil*Water | 0.7626            | -                   | 0.7626            | 0.9494            | 0.1993            | 0.1229           |
| 7   | Genotype             | 0.1587            | 0.8574              | 0.1859            | 0.2855            | 0.2926            | 0.6636           |
|     | TopSoil              | 0.0725            | <.0001              | 0.0203            | 0.0213            | 0.0615            | 0.0346           |
|     | Water                | <.0001            | <.0001              | <.0001            | <.0001            | 0.0407            | <.0001           |
|     | Genotype*TopSoil     | 0.0645            | 0.2953              | 0.0495            | 0.352             | 0.6237            | 0.3952           |
|     | Genotype*Water       | 0.5464            | 0.5166              | 0.6286            | 0.0471            | 0.6169            | 0.9796           |
|     | TopSoil*Water        | 0.0207            | <.0001              | 0.0001            | 0.0431            | 0.3998            | 0.6527           |
|     | Genoty*TopSoil*Water | 0.8658            | 0.2931              | 0.7818            | 0.3837            | 0.049             | 0.0312           |
| 10  | Genotype             | 0.2675            | 0.2481              | 0.21              | 0.0627            | 0.0516            | 0.8156           |
|     | TopSoil              | 0.0845            | <.0001              | 0.0023            | 0.0689            | 0.0572            | 0.0261           |
|     | Water                | <.0001            | <.0001              | <.0001            | <.0001            | 0.0513            | <.0001           |
|     | Genotype*TopSoil     | 0.18              | 0.5294              | 0.2528            | 0.6811            | 0.2728            | 0.3056           |
|     | Genotype*Water       | 0.9119            | 0.5061              | 0.7917            | 0.3758            | 0.778             | 0.7095           |
|     | TopSoil*Water        | 0.0452            | <.0001              | <.0001            | 0.4746            | 0.7539            | 0.8391           |
|     | Genoty*TopSoil*Water | 0.8008            | 0.5165              | 0.6902            | 0.2059            | 0.0154            | 0.0084           |
| 12  | Genotype             | 0.1677            | 0.2236              | 0.1257            | 0.012             | 0.0928            | 0.9236           |
|     | TopSoil              | 0.0717            | <.0001              | 0.0039            | 0.0841            | 0.0152            | 0.0028           |
|     | Water                | <.0001            | <.0001              | <.0001            | <.0001            | 0.1112            | <.0001           |
|     | Genotype*TopSoil     | 0.2161            | 0.046               | 0.1777            | 0.495             | 0.1246            | 0.0719           |
|     | Genotype*Water       | 0.9326            | 0.7791              | 0.9926            | 0.502             | 0.8006            | 0.7682           |
|     | TopSoil*Water        | 0.1234            | <.0001              | 0.005             | 0.8328            | 0.6188            | 0.5125           |
|     | Genoty*TopSoil*Water | 0.7657            | 0.4405              | 0.6046            | 0.1755            | 0.0078            | 0.0031           |
| 14  | Genotype             | 0.1422            | 0.1389              | 0.099             | 0.0071            | 0.077             | 0.7448           |
|     | TopSoil              | 0.0297            | 0.0014              | 0.002             | 0.0705            | 0.0056            | 0.002            |
|     | Water                | <.0001            | <.0001              | <.0001            | <.0001            | 0.3169            | <.0001           |
|     | Genotype*TopSoil     | 0.3409            | 0.0594              | 0.1477            | 0.5191            | 0.2446            | 0.0939           |
|     | Genotype*Water       | 0.6915            | 0.9235              | 0.7802            | 0.6817            | 0.8368            | 0.989            |
|     | TopSoil*Water        | 0.2706            | 0.0063              | 0.0513            | 0.8991            | 0.6545            | 0.3769           |
|     | Genoty*TopSoil*Water | 0.855             | 0.7025              | 0.7374            | 0.2585            | 0.0443            | 0.0193           |
| 17  | Genotype             | 0.2194            | 0.4689              | 0.2253            | 0.0023            | 0.0553            | 0.6528           |
|     | TopSoil              | 0.0091            | 0.0062              | 0.001             | 0.0426            | 0.0063            | 0.0015           |
|     | Water                | <.0001            | 0.3215              | <.0001            | <.0001            | 0.3843            | <.0001           |
|     | Genotype*TopSoil     | 0.3637            | 0.0569              | 0.1179            | 0.4395            | 0.5475            | 0.101            |
|     | Genotype*Water       | 0.6129            | 0.674               | 0.8563            | 0.8231            | 0.881             | 0.8933           |
|     | TopSoil*Water        | 0.61              | 0.2051              | 0.3335            | 0.6608            | 0.6846            | 0.2465           |
|     | Genoty*TopSoil*Water | 0.9278            | 0.7207              | 0.7962            | 0.5934            | 0.0369            | 0.0252           |

|              |                             |        |        |        |        |        |        |
|--------------|-----------------------------|--------|--------|--------|--------|--------|--------|
| <b>19</b>    | <i>Genotype</i>             | 0.2653 | 0.4252 | 0.2255 | 0.0028 | 0.0911 | 0.4309 |
|              | <i>TopSoil</i>              | 0.0108 | 0.0033 | 0.0011 | 0.0483 | 0.0181 | 0.002  |
|              | <i>Water</i>                | <.0001 | 0.799  | <.0001 | <.0001 | 0.3276 | <.0001 |
|              | <i>Genotype*TopSoil</i>     | 0.5024 | 0.0574 | 0.1467 | 0.4595 | 0.3999 | 0.0603 |
|              | <i>Genotype*Water</i>       | 0.6458 | 0.5207 | 0.9684 | 0.6111 | 0.9191 | 0.5091 |
|              | <i>TopSoil*Water</i>        | 0.7185 | 0.3364 | 0.4742 | 0.6472 | 0.8418 | 0.3406 |
|              | <i>Genoty*TopSoil*Water</i> | 0.9354 | 0.8226 | 0.8546 | 0.8471 | 0.0159 | 0.0148 |
| <b>21</b>    | <i>Genotype</i>             | 0.4961 | 0.2662 | 0.2817 | 0.0413 | 0.1587 | 0.3418 |
|              | <i>TopSoil</i>              | 0.0076 | 0.0007 | 0.0004 | 0.0215 | 0.0137 | 0.0034 |
|              | <i>Water</i>                | <.0001 | 0.131  | <.0001 | <.0001 | 0.2241 | <.0001 |
|              | <i>Genotype*TopSoil</i>     | 0.5767 | 0.0454 | 0.1476 | 0.6695 | 0.3808 | 0.0694 |
|              | <i>Genotype*Water</i>       | 0.9409 | 0.6105 | 0.8468 | 0.0528 | 0.6978 | 0.3112 |
|              | <i>TopSoil*Water</i>        | 0.8335 | 0.5974 | 0.6614 | 0.2491 | 0.9823 | 0.5563 |
|              | <i>Genoty*TopSoil*Water</i> | 0.9165 | 0.9046 | 0.8917 | 0.9643 | 0.0168 | 0.0214 |
| <b>24</b>    | <i>Genotype</i>             | 0.6567 | 0.0273 | 0.1384 | 0.0655 | 0.1318 | 0.2501 |
|              | <i>TopSoil</i>              | 0.0233 | <.0001 | 0.0003 | 0.0356 | 0.0061 | 0.0019 |
|              | <i>Water</i>                | <.0001 | <.0001 | <.0001 | <.0001 | 0.0878 | <.0001 |
|              | <i>Genotype*TopSoil</i>     | 0.4058 | 0.0249 | 0.0733 | 0.7335 | 0.3739 | 0.0944 |
|              | <i>Genotype*Water</i>       | 0.7498 | 0.8266 | 0.7503 | 0.0798 | 0.985  | 0.1443 |
|              | <i>TopSoil*Water</i>        | 0.9149 | 0.8339 | 0.96   | 0.036  | 0.9755 | 0.5262 |
|              | <i>Genoty*TopSoil*Water</i> | 0.6925 | 0.764  | 0.6692 | 0.6862 | 0.0598 | 0.0723 |
| <b>Total</b> | <i>t</i>                    | <.0001 | <.0001 | <.0001 | <.0001 | <.0001 | <.0001 |
|              | <i>t*Genotype</i>           | 0.198  | 0.2541 | 0.14   | 0.0023 | 0.0542 | 0.5215 |
|              | <i>t*TopSoil</i>            | <.0001 | <.0001 | <.0001 | <.0001 | <.0001 | <.0001 |
|              | <i>t*Water</i>              | <.0001 | <.0001 | <.0001 | <.0001 | 0.0004 | <.0001 |
|              | <i>t*Genotype*TopSoil</i>   | 0.0005 | 0.2027 | 0.0002 | 0.0077 | 0.0069 | 0.0013 |
|              | <i>t*Genotype*Water</i>     | 0.9721 | 0.941  | 0.6222 | 0.0021 | 0.7077 | 0.3651 |
|              | <i>t*TopSoil*Water</i>      | <.0001 | <.0001 | <.0001 | 0.2897 | 0.4521 | 0.0719 |
|              | <i>t*Genot*TopSoi*Water</i> | 0.3315 | 0.2792 | 0.1857 | 0.0262 | <.0001 | <.0001 |

Supplementary Table 2) P-value data of the repeated shoot measurements from a mixed-effect model with variables Cultivar, Top Soil, and Water treatment (plus their interaction) for each day, plus the combined analysis with all variables combined with the time element (day) for those with more than two time points. The P-values highlighted (green) are those that are classified as significant (P>0.05).

| Day   | Effect               | Height | GS     | SPAD   | Fv/Fm  | Mn predict | P predict |
|-------|----------------------|--------|--------|--------|--------|------------|-----------|
| 7     | Genotype             | 0.4729 | 0.3832 | -      | -      | -          | -         |
|       | TopSoil              | <.0001 | 0.1436 | -      | -      | -          | -         |
|       | Water                | <.0001 | <.0001 | -      | -      | -          | -         |
|       | Genotype*TopSoil     | 0.0991 | 0.1876 | -      | -      | -          | -         |
|       | Genotype*Water       | 0.5677 | 0.3147 | -      | -      | -          | -         |
|       | TopSoil*Water        | 0.004  | 0.1158 | -      | -      | -          | -         |
|       | Genoty*TopSoil*Water | 0.8612 | 0.2568 | -      | -      | -          | -         |
| 10    | Genotype             | -      | 0.2502 | 0.0253 | -      | -          | -         |
|       | TopSoil              | -      | 0.0013 | 0.0287 | -      | -          | -         |
|       | Water                | -      | 0.0002 | <.0001 | -      | -          | -         |
|       | Genotype*TopSoil     | -      | 0.9458 | 0.201  | -      | -          | -         |
|       | Genotype*Water       | -      | 0.8114 | 0.1008 | -      | -          | -         |
|       | TopSoil*Water        | -      | 0.3657 | 0.0102 | -      | -          | -         |
|       | Genoty*TopSoil*Water | -      | 0.9498 | 0.1448 | -      | -          | -         |
| 14    | Genotype             | -      | 0.7507 | 0.1845 | -      | -          | -         |
|       | TopSoil              | -      | 0.0315 | 0.0139 | -      | -          | -         |
|       | Water                | -      | <.0001 | 0.0503 | -      | -          | -         |
|       | Genotype*TopSoil     | -      | 0.6539 | 0.0145 | -      | -          | -         |
|       | Genotype*Water       | -      | 0.7507 | 0.2516 | -      | -          | -         |
|       | TopSoil*Water        | -      | 0.2798 | 0.2682 | -      | -          | -         |
|       | Genoty*TopSoil*Water | -      | 0.7766 | 0.3859 | -      | -          | -         |
| 17    | Genotype             | -      | 0.342  | 0.8294 | 0.0106 | 0.0007     | 0.0261    |
|       | TopSoil              | -      | 0.022  | 0.0531 | 0.1549 | 0.0231     | 0.7887    |
|       | Water                | -      | <.0001 | <.0001 | <.0001 | <.0001     | <.0001    |
|       | Genotype*TopSoil     | -      | 0.0984 | 0.0001 | 0.483  | 0.3752     | 0.2698    |
|       | Genotype*Water       | -      | 0.2863 | 0.4486 | 0.8194 | 0.7728     | 0.9371    |
|       | TopSoil*Water        | -      | 0.1109 | 0.165  | 0.9841 | 0.8593     | 0.1435    |
|       | Genoty*TopSoil*Water | -      | 0.291  | 0.3876 | 0.2374 | 0.333      | 0.1205    |
| 21    | Genotype             | 0.0016 | 0.8569 | 0.4235 | 0.5136 | 0.7245     | 0.8518    |
|       | TopSoil              | 0.1522 | 0.0061 | 0.0561 | 0.5821 | 0.8239     | 0.4323    |
|       | Water                | <.0001 | <.0001 | 0.0002 | <.0001 | <.0001     | <.0001    |
|       | Genotype*TopSoil     | 0.5762 | 0.7136 | 0.3172 | 0.4132 | 0.5517     | 0.043     |
|       | Genotype*Water       | 0.3457 | 0.8569 | 0.8544 | 0.5975 | 0.8764     | 0.4754    |
|       | TopSoil*Water        | 0.0164 | 0.0037 | 0.804  | 0.5612 | 0.0518     | 0.3807    |
|       | Genoty*TopSoil*Water | 0.2439 | 0.9829 | 0.0803 | 0.6563 | 0.0507     | 0.6905    |
| 24    | Genotype             | <.0001 | 0.4252 | 0.4313 | -      | -          | -         |
|       | TopSoil              | 0.004  | 0.3585 | 0.2681 | -      | -          | -         |
|       | Water                | <.0001 | <.0001 | <.0001 | -      | -          | -         |
|       | Genotype*TopSoil     | 0.4013 | 0.6494 | 0.0616 | -      | -          | -         |
|       | Genotype*Water       | 0.6075 | 0.273  | 0.4588 | -      | -          | -         |
|       | TopSoil*Water        | 0.7266 | 0.24   | 0.4528 | -      | -          | -         |
|       | Genoty*TopSoil*Water | 0.612  | 0.8873 | 0.6467 | -      | -          | -         |
| Total | t                    | <.0001 | <.0001 | <.0001 | -      | -          | -         |
|       | t*Genotype           | 0.0017 | 0.5449 | 0.4678 | -      | -          | -         |
|       | t*TopSoil            | 0.0001 | 0.0025 | 0.028  | -      | -          | -         |
|       | t*Water              | <.0001 | <.0001 | <.0001 | -      | -          | -         |
|       | t*Genotype*TopSoil   | 0.1811 | 0.4777 | 0.1538 | -      | -          | -         |
|       | t*Genotype*Water     | 0.2982 | 0.6492 | 0.7866 | -      | -          | -         |
|       | t*TopSoil*Water      | 0.0297 | 0.0097 | 0.9359 | -      | -          | -         |
|       | t*Genot*TopSoi*Water | 0.2215 | 0.9726 | 0.1189 | -      | -          | -         |

Supplementary Table 3) P-value data of the destructive shoot and root measurements from a mixed-effect model with variables Cultivar, Top Soil, and Water treatment (plus their interaction) for the last (24<sup>th</sup>) day of the experiment. The P-values highlighted (green) are those that are classified as significant (P>0.05).

| Effect                      | Leaf Area | Shoot FW | Shoot DW | Log Shoot FW:DW Ratio |
|-----------------------------|-----------|----------|----------|-----------------------|
| <i>Genotype</i>             | 0.666     | 0.7886   | 0.4349   | 0.1615                |
| <i>TopSoil</i>              | 0.0006    | 0.0002   | 0.0002   | 0.3843                |
| <i>Water</i>                | <.0001    | <.0001   | <.0001   | <.0001                |
| <i>Genotype*TopSoil</i>     | 0.0063    | 0.0151   | 0.01     | 0.2316                |
| <i>Genotype*Water</i>       | 0.4669    | 0.3576   | 0.4557   | 0.5327                |
| <i>TopSoil*Water</i>        | 0.6181    | 0.4093   | 0.8309   | 0.5262                |
| <i>Genoty*TopSoil*Water</i> | 0.2069    | 0.3257   | 0.1753   | 0.059                 |

  

| Effect                      | Root DW | Log Root:Shoot Ratio | Nitrogen Concentration | Nitrogen per Plant |
|-----------------------------|---------|----------------------|------------------------|--------------------|
| <i>Genotype</i>             | 0.5311  | 0.0724               | 0.5362                 | 0.3585             |
| <i>TopSoil</i>              | 0.594   | 0.014                | 0.0993                 | 0.006              |
| <i>Water</i>                | <.0001  | 0.0002               | 0.0005                 | <.0001             |
| <i>Genotype*TopSoil</i>     | 0.3295  | 0.8738               | 0.8441                 | 0.0006             |
| <i>Genotype*Water</i>       | 0.5924  | 0.397                | 0.945                  | 0.977              |
| <i>TopSoil*Water</i>        | 0.7702  | 0.3339               | 0.2777                 | 0.0265             |
| <i>Genoty*TopSoil*Water</i> | 0.992   | 0.5434               | 0.6763                 | 0.0037             |

Supplementary Table 4) P-value data of the root length measurements from a mixed-effect model with variables Cultivar, Top Soil, and Water treatment (plus their interaction) for the last (24<sup>th</sup>) day of the experiment, divided into either three horizontal (A) or four vertical (B) sections. The Centre and Topsoil sections of the Horizontal and Vertical sectioning, respectively, contain the treated soil sections. The P-values highlighted (green) are those that are classified as significant (P>0.05).

| A) Horizontal Sections |                             |                   |                     |
|------------------------|-----------------------------|-------------------|---------------------|
|                        | Effect                      | Axial Root Length | Lateral Root Length |
| Left                   | <i>Genotype</i>             | 0.8748            | 0.0569              |
|                        | <i>TopSoil</i>              | 0.7294            | 0.0285              |
|                        | <i>Genotype*TopSoil</i>     | 0.8129            | 0.0304              |
|                        | <i>Water</i>                | <.0001            | 0.7512              |
|                        | <i>Genotype*Water</i>       | 0.8717            | 0.9335              |
|                        | <i>TopSoil*Water</i>        | 0.7558            | 0.6259              |
|                        | <i>Genoty*TopSoil*Water</i> | 0.0741            | 0.3175              |
| Centre                 | <i>Genotype</i>             | 0.2855            | 0.4031              |
|                        | <i>TopSoil</i>              | 0.6349            | 0.0359              |
|                        | <i>Genotype*TopSoil</i>     | 0.2829            | 0.268               |
|                        | <i>Water</i>                | <.0001            | <.0001              |
|                        | <i>Genotype*Water</i>       | 0.519             | 0.7798              |
|                        | <i>TopSoil*Water</i>        | 0.6754            | 0.3649              |
|                        | <i>Genoty*TopSoil*Water</i> | 0.2553            | 0.0362              |
| Right                  | <i>Genotype</i>             | 0.0997            | 0.2669              |
|                        | <i>TopSoil</i>              | 0.4612            | 0.0716              |
|                        | <i>Genotype*TopSoil</i>     | 0.3859            | 0.5726              |
|                        | <i>Water</i>                | 0.3396            | 0.7237              |
|                        | <i>Genotype*Water</i>       | 0.1814            | 0.8336              |
|                        | <i>TopSoil*Water</i>        | 0.4012            | 0.568               |
|                        | <i>Genoty*TopSoil*Water</i> | 0.8664            | 0.9962              |

  

| B) Vertical Sections |                             |                   |                     |
|----------------------|-----------------------------|-------------------|---------------------|
|                      | Effect                      | Axial Root Length | Lateral Root Length |
| Topsoil              | <i>Genotype</i>             | 0.6974            | 0.4764              |
|                      | <i>TopSoil</i>              | 0.0567            | <.0001              |
|                      | <i>Genotype*TopSoil</i>     | 0.1257            | 0.1858              |
|                      | <i>Water</i>                | <.0001            | <.0001              |
|                      | <i>Genotype*Water</i>       | 0.4164            | 0.7156              |
|                      | <i>TopSoil*Water</i>        | 0.8655            | <.0001              |
|                      | <i>Genoty*TopSoil*Water</i> | 0.1461            | 0.5307              |
| Top                  | <i>Genotype</i>             | 0.8611            | 0.3624              |
|                      | <i>TopSoil</i>              | 0.9452            | 0.1928              |
|                      | <i>Genotype*TopSoil</i>     | 0.4624            | 0.4176              |
|                      | <i>Water</i>                | <.0001            | 0.2499              |
|                      | <i>Genotype*Water</i>       | 0.0009            | 0.4626              |
|                      | <i>TopSoil*Water</i>        | 0.5407            | 0.0962              |
|                      | <i>Genoty*TopSoil*Water</i> | 0.2405            | 0.2302              |
| Middle               | <i>Genotype</i>             | 0.4014            | 0.1898              |
|                      | <i>TopSoil</i>              | 0.0068            | 0.0014              |
|                      | <i>Genotype*TopSoil</i>     | 0.7396            | 0.1913              |
|                      | <i>Water</i>                | <.0001            | <.0001              |
|                      | <i>Genotype*Water</i>       | 0.467             | 0.954               |
|                      | <i>TopSoil*Water</i>        | 0.6242            | 0.1445              |
|                      | <i>Genoty*TopSoil*Water</i> | 0.9316            | 0.4983              |
| Bottom               | <i>Genotype</i>             | 0.7526            | 0.102               |
|                      | <i>TopSoil</i>              | 0.0806            | 0.1353              |
|                      | <i>Genotype*TopSoil</i>     | 0.6162            | 0.2693              |
|                      | <i>Water</i>                | <.0001            | <.0001              |
|                      | <i>Genotype*Water</i>       | 0.0586            | 0.1315              |
|                      | <i>TopSoil*Water</i>        | 0.6263            | 0.1634              |
|                      | <i>Genoty*TopSoil*Water</i> | 0.6929            | 0.3126              |
